# Supplementary material for: The phi027 bacteriophage influences physiology and virulence of the lysogenic strain of Clostridioides difficile
Source: Sci Rep. 2025 May 29;15:18856. doi: 10.1038/s41598-025-04106-0 (PMC12122855; doi:10.1038/s41598-025-04106-0)
Supplement: Supplementary file 6 — Supplementary Material 6 [file 41598_2025_4106_MOESM6_ESM.xlsx]

## Sheet: Arkusz1
GenBank accession number	Strain	Collection date	Geographical localisation
CP026593.1	12-00008	2012	Germany
CP026592.1	CD-10-00484	2010	Germany
CP026591.1	CD-17-01474	2007	Germany
CP026594.1	08-00495	2008	Germany
CP026595.1	12-00011	2012	Germany
CP026596.1	10-00071	2010	Germany
CP026599.1	09-00072	2009	Germany
CP026597.1	10-00078	2010	Germany
CP026598.1	10-00253	2010	Germany
CP011846.1	DSM 27638	2013	Germany
CP011848.1	DSM 27640	2013	Germany
CP012320.1	DSM 28196	2013	Germany
CP028525.1	20482	2011	USA
CP028523.1	20474	2014	USA
CP028526.1	20688	2011	USA
CP028527.1	20695	2011	USA
CP028528.1	20696	2014	USA
CP028530.1	20711	2014	USA
CP046327.1	FDAARGOS_723		USA:VA
CP029423.1	R20291	2006	UK
CP073752.1	2015	2007	USA:Michigan
CP107111.1	R_cdtRstop4		USA:Chicago
CP107110.1	R_cdtRstop8		USA:Chicago
CP107109.1	R_cdtRmut6		USA:Chicago
CP107108.1	R_phiCD75-3		USA:Chicago
CP107113.1	R_cdtRKO10		USA:Chicago
CP107112.1	R_cdtRKO8		USA:Chicago
CP115183.1	R20291	2006	UK
CP117957.1	P4D3A1-1	2019	USA
CP126076.1	CDI-01	2016	USA
CP118685.1	M7404	2005	Canada
CP134872.1	TS3_3	2020	Germany
CP151682.1	UK1	2007	UK
FN545816.1	R20291		UK
FN665654.1	2007855	2007	USA
FN668941.1	BI1	1988	USA
LR698984.1	MGYG-HGUT-02369		USA
